# Supplementary material for: Development of an Efficient Extraction Method for Harvesting Gymnodimine-A from Large-Scale Cultures of Karenia selliformis
Source: MDPI journal article supplement (doi:10.3390/toxins13110793), 2021-11-10
Supplement: s1 [file s1]

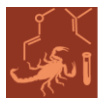

# Supplementary Materials: Development of an Efficient Extraction Method for Harvesting Gymnodimine-A from Large-Scale Cultures of *Karenia selliformis*

Zhixuan Tang, Jiangbing Qiu, Guixiang Wang, Ying Ji, Philipp Hess and Aifeng Li

**Table S1.** Recovery (%) of spiked GYM-A with different concentrations (ng mL<sup>-1</sup>) in seawater loading on HLB SPE cartridge.

| Spiked concentration | Recovery | RSD |
|----------------------|----------|-----|
| 97                   | 99       | 2.0 |
| 10                   | 101      | 1.8 |
| 1.1                  | 104      | 1.3 |

**Table S2.** Intracellular GYM-A content in different growth stages of *Karenia selliformis* (fg cell<sup>-1</sup>).

| Growth time (day)   | 5   | 10  | 15 | 20 | 25 | 30  |
|---------------------|-----|-----|----|----|----|-----|
| Intracellular GYM-A | 107 | 102 | 64 | 55 | 82 | 149 |

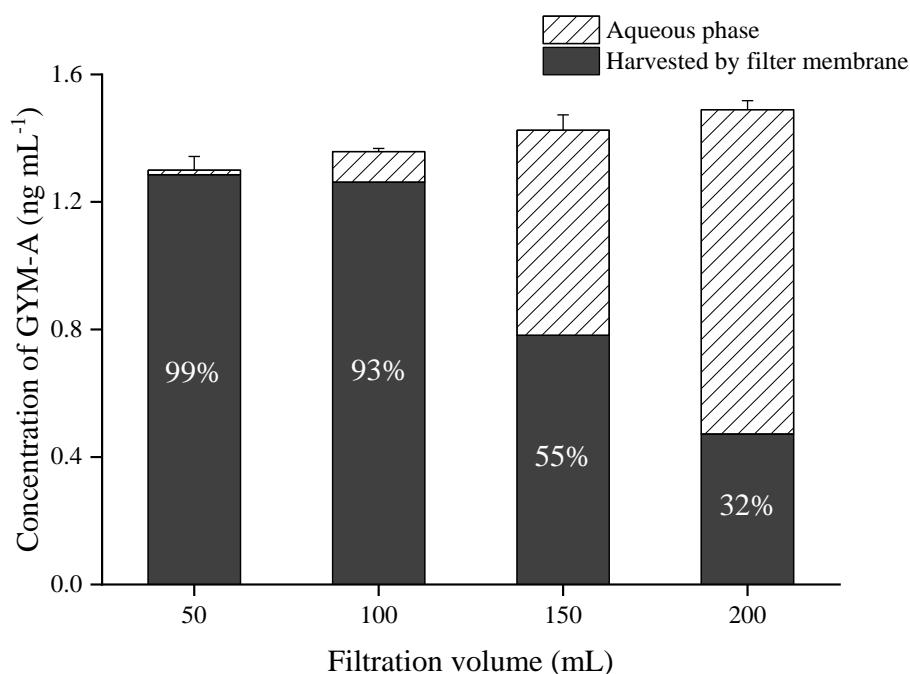

**Figure S1.** GYM-A distribution in algal pellets on filter and aqueous phase when collecting different volumes of *K. selliformis* cultures by filter filtration.

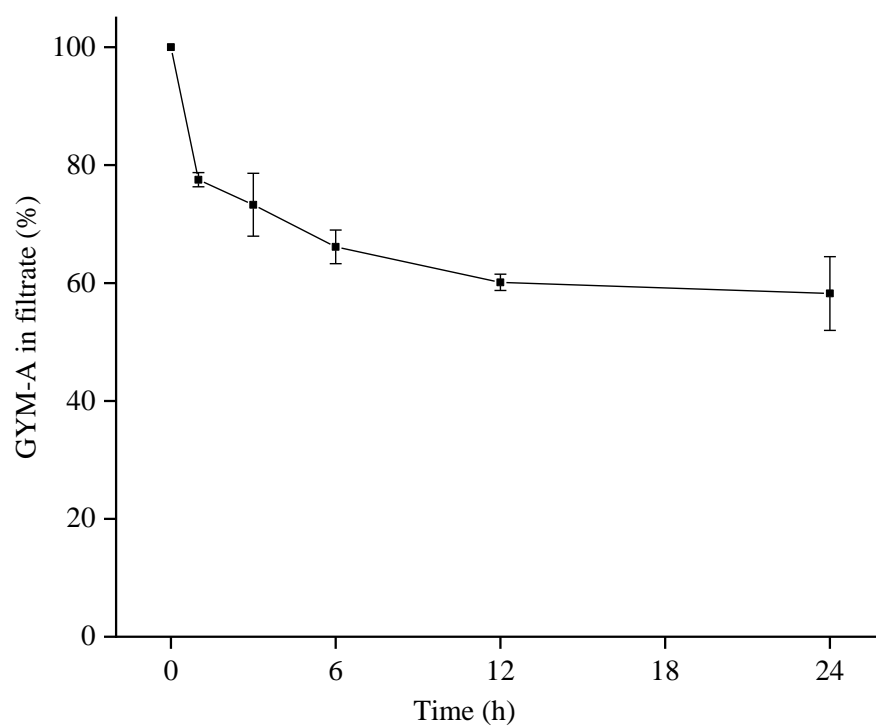

**Figure S2.** Variation of GYM-A content (%) in *K. selliformis* filtrate with adsorption time of HP20 resin bag.

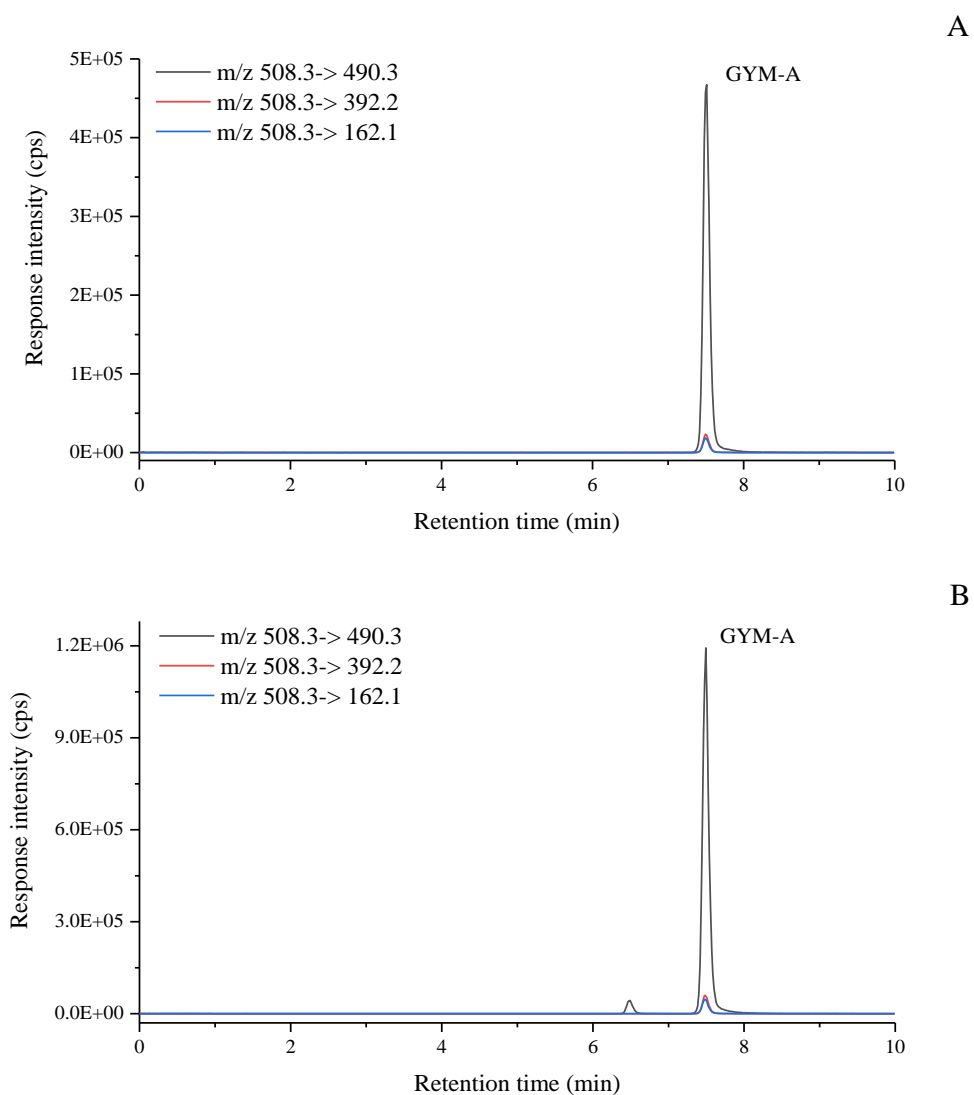

**Figure S3** LC-MS/MS chromatograms of GYM-A in standard (A) and crude GYM-A methanolic extracts (B).-positive MRSA.
